# Supplementary material for: Inferring ancient metabolism using ancestral core metabolic models of enterobacteria
Source: PubMed Central journal article supplement (PMC3694032; doi:10.1186/1752-0509-7-46), 2013-06-11

# Additional File 1.

# Aerobic

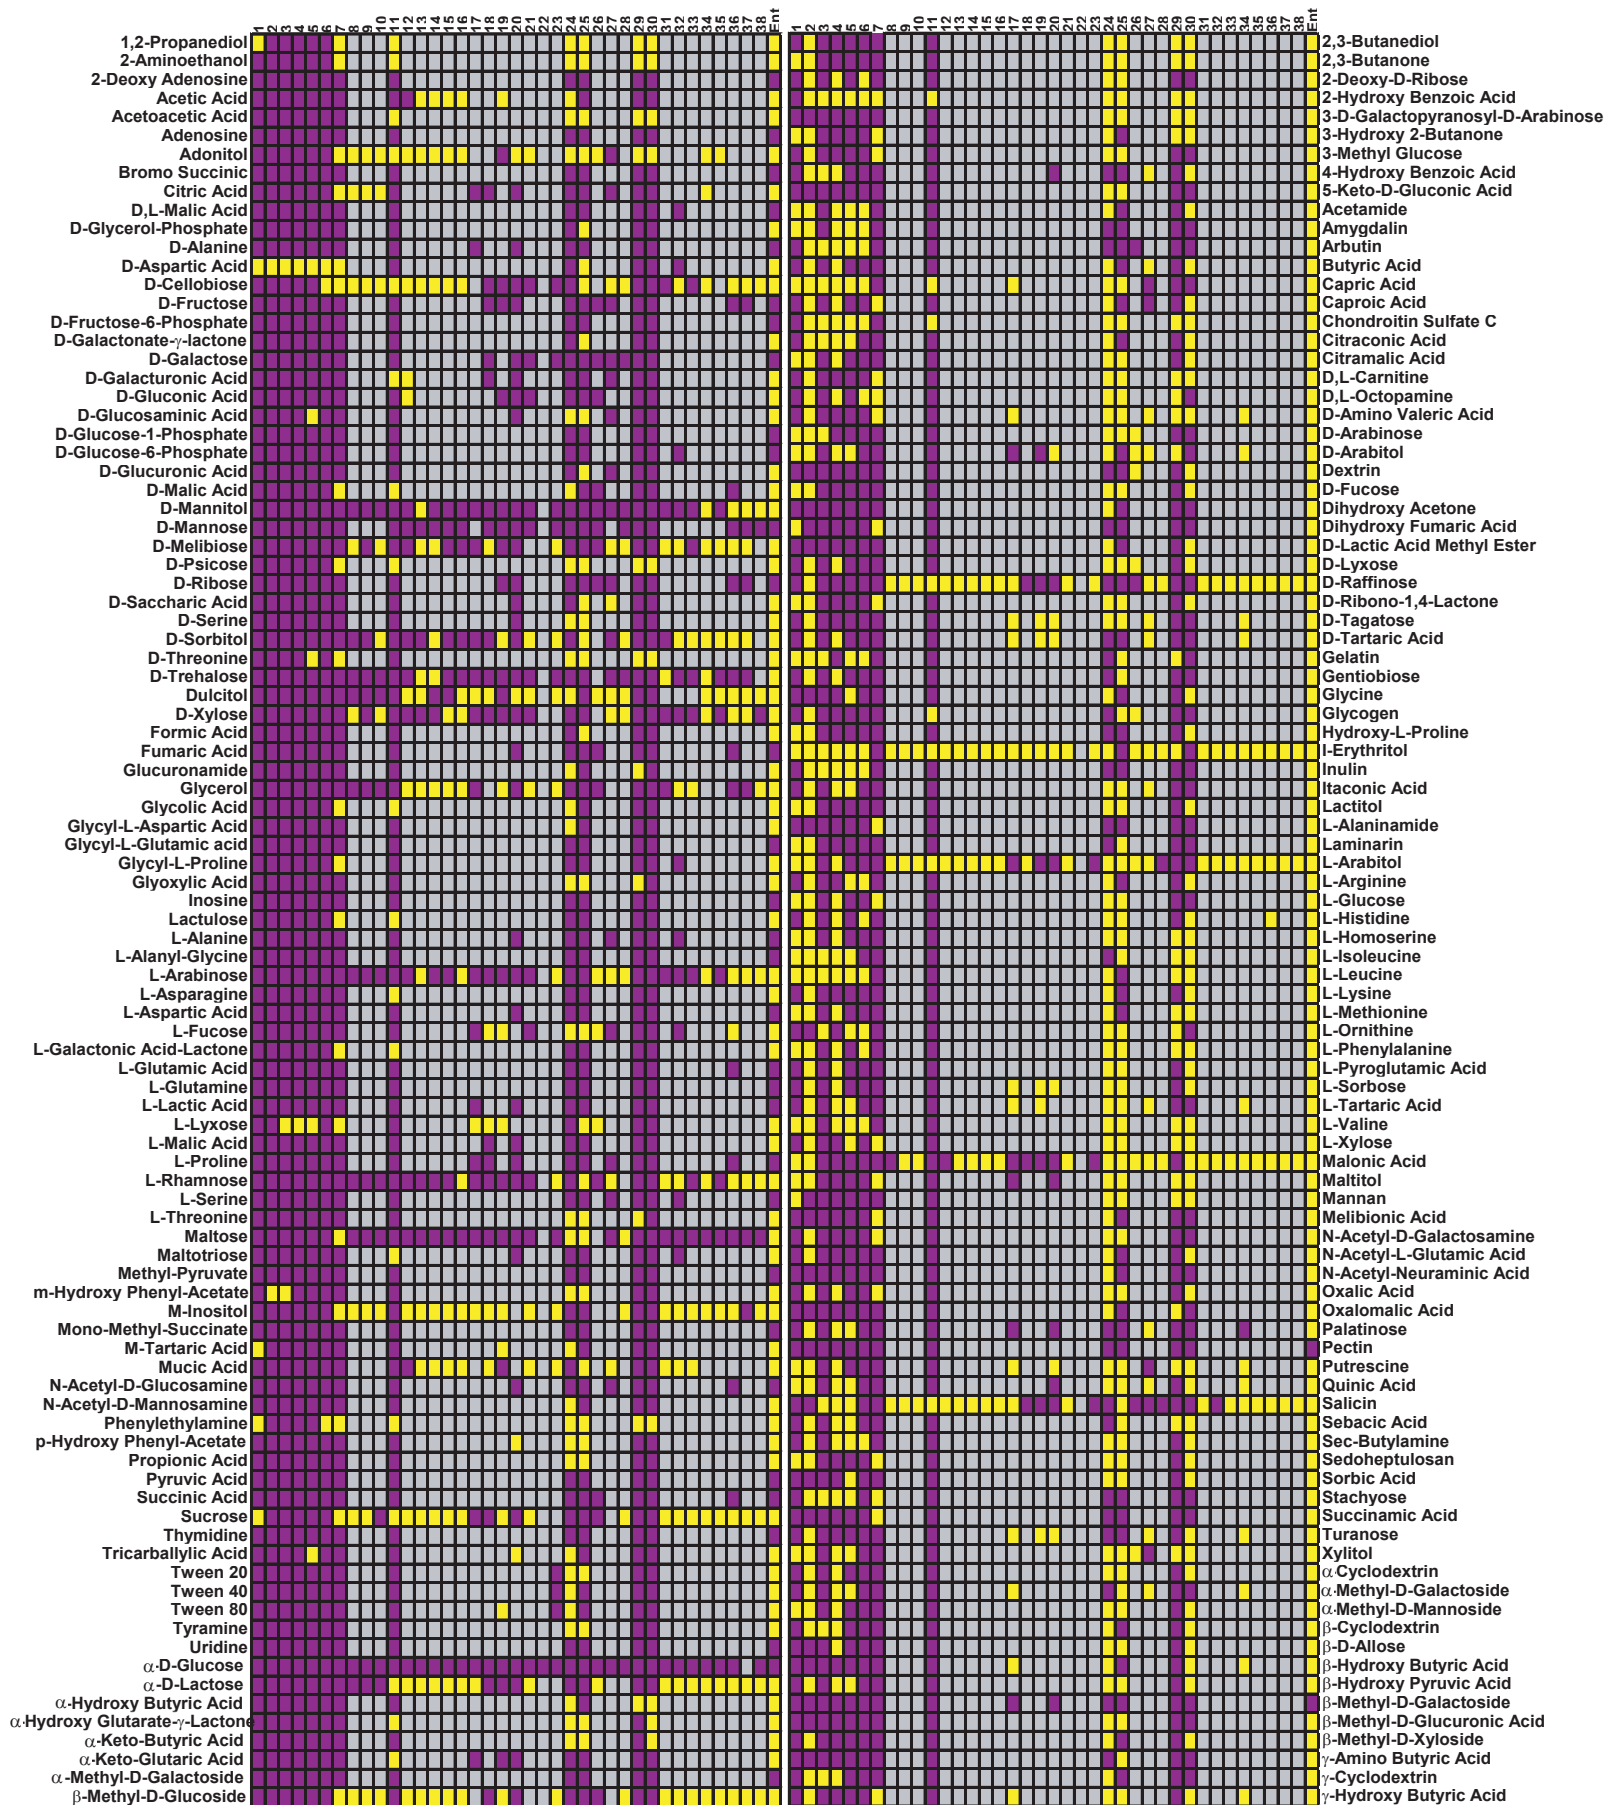

Supplement: 1752-0509-7-46-S1.pdf [file 1752-0509-7-46-S1.pdf]
